# Supplementary material for: Recent genome resequencing paraded COBRA-Like gene family roles in abiotic stress and wood formation in Poplar
Source: Front Plant Sci. 2023 Sep 15;14:1242836. doi: 10.3389/fpls.2023.1242836 (PMC10540467; doi:10.3389/fpls.2023.1242836)
Supplement: Supplementary file 2 [file Table_1.xlsx]

## Sheet: Sheet1
						Supplementary Table S1
PtrACTIN-F:	AAACTGTAATGGTCCTCCCTCCG
PtrACTIN-R:	GCATCATCACAATCACTCTCCGA
qCBL1-F	GCC TGT GGT TGT GAC AAT AAT ATA GG
qCBL1-R	G GAC AAT TAT CAG GAC AAG GTC TTG
qCBL2-F	GTT GTG GGG AGT AAA GTT CTA CAA TG
qCBL2-R	G CAA TTG TCA CCA TTG AAA TAG ATT CTC
qCBL3-F	GCT TCG AGT ACA AAC CTC TCA TTG
qCBL3-R	CA CCT CAG ATT GAA GAT TTC CAA GTG
qCBL4-F	GCA GAC CAA AGT ACT GTT TCA TGC
qCBL4-R	G ATT GTC ATT TTC ACT CTC CAG TGG
qCBL5-F	CAAGATGTTGTGTTTCCTTGTCTGC
qCBL5-R	CATATGCTCTGAGCACCTTACTAC
qCBL6-F	GAT AAT TGT GGA GTT AGT ATC AAC TGG C
qCBL6-R	GCT TCC ATT GAA TGA GTA CAT AGC TTC
qCBL7-F	GTC CTG ATA ACT GTC CAG TTA GC
qCBL7-R	G GAA TAC ACA CCT TCA AGG CCC
qCBL8-F	GTG TCA TGA GCA ATT CCA GAA TTT CAA G
qCBL8-R	GAA ATT GGT GAC TGT AAT CTT CAC ACG
qCBL9-F	GCA ATT AGA CAA TGC AGC ACC AGG
qCBL9-R	GAA TGA TAT TAC TGA TTG CTG CAT GCC
qCBL10-F	GCT TGT GGC TGT CAA AAT ACT ACT G
qCBL10-R	GA CTC GGA TTG GAC ACA TAT GGC
qCBL11-F	GCT ACA ATG CAC ACA TCA TAT GTG C
qCBL11-R	G CTG AAG ACT TGA GTG ACA TTG TTG
qCBL12-F	GCC ACT CTT GCC ATA TAA ATC AGC
qCBL12-R	GCA TTC ATC CCC ATT GAA GTA GAC
qCBL13-F	GCT CAA CTA CAA GGA TTA CTG GAG
qCBL13-R	GC TTT GTA TTT AGA GCC GAA AAC CTG
qCBL14-F	CTT CTC TTT CAA CTA CTA ATG ATA CTG C
qCBL14-R	G CCA TTG AAA TAG ATT CTC TGA GGG
