# Supplementary material for: Recent genome resequencing paraded COBRA-Like gene family roles in abiotic stress and wood formation in Poplar
Source: Front Plant Sci. 2023 Sep 15;14:1242836. doi: 10.3389/fpls.2023.1242836 (PMC10540467; doi:10.3389/fpls.2023.1242836)
Supplement: Supplementary file 3 [file Table_2.xls]

## Sheet: COBL_Promotor CREs
Supp. Table S2. Frequency heatmap of Cis-regulatory elements. CREs identified in the promoter of the PtrCOBLs.
Cis-element	PtrCOBL1	PtrCOBL2	PtrCOBL3	PtrCOBL4	PtrCOBL5	PtrCOBL6	PtrCOBL7	PtrCOBL8	PtrCOBL9	PtrCOBL10	PtrCOBL11	PtrCOBL12	PtrCOBL13	PtrCOBL14
AAGAA-motif	2	3	6	1	2	4	3		2			3	3	1
AT1 motif			1		1		1		1
AE-box	1	1		1	1	1			1				1	1
ABRE	2	2	1	1		3	2	3	4			2	4	3
ABRE3a	1		1	1			1
ABRE4	1		1	1			1
ACE				1				1
AC-I											1	1
AP-1			1									1
ARE	3	7	3	2	4	1	2	4	2	1			1	1
AT-rich element		1								1				1
AT~TATA-box	11		2	5	9	10	1	5	20	3	4	3	9	15
Box III		1												1
Box 4		5	2	2	3	2	2		2	6	2	3	2	3
circadian										1	1
CAAT-box	28	33	34	26	34	43	29	31	27	41	31	50	27	28
CCAAT-box						1	1			2	2	1
CAT box	1	1	1	1	1			2	1	1			1	1
CTAG-motif						1			1
GATA motif		1	1	1	1	1					1	1
GT1 motif					3	3		1	1	6	1	3		2
ERE	1	2	2	2		5		3		2		1		2
G box	3	2	1	1	1	3	2	5	3			2	4	3
F-box		1
GCN4 motif						1				1		1
GA motif		1				2						1
MSA-like										2
MBS I		1					1					0
MBS	2	1		1				2	2			1	2	3
MYB	5	2	3	5	1	2	2	2	2	4	6	6	5	5
MYB recognition site						1	1			2	2	1
MYB-like sequence			2		1	2		1		1	2		1	2
MYc				1	1	1		1		1		1
MYC		2	3	6	2	2	1	4	2	3	2	5	2	1
Myb	3	2		2			2	2	2	1		1	3	3
Myb-binding site	5			2			2		1	2	2	5	3
P-box			1			1			3		1		1
O2 site			1		1			1	1					1
STRE	1	1	1	4	1	8	1	1	2	1	3	5	8	1
TATA-box	39	19	20	31	34	29	26	24	41	25	14	17	21	53
TC-rich repeats		2		3		1	1	2		1			1	2
TCA-element	1				2		1	3	1	1	3	1
TGA-element		2	1	1				1	1			1	1	1
TCCC motif	2									1				1
W box	2			1	1			1		1		3
TATA	1	1	2	1	1		1	1		1	1		1
TCT - motif	1	2	1	3		2	1		1	2	2	1	1	1
as-1	3	1	1	1	2	1	1		3	1	1			1
chs-CMA2a								1
WUN-motif	1	3	3			2	2		2			2	3
TCA					1		1	1	1		2	1
TGACG-motif	3	1	1	1	2	1	1		3	1	1			1
HD-Zip1		1
Pc-CMA2c				1
E2Fb	1						1
GARE-motif											1	1	1
GC-motif												1	1
Gap-box												1
dOCT		1
LTR	1	2		1	1				1				3
AuxRR-core			1					2					1
Box S													1
3-AF1 binding site		1		1		1				1
RY-element			3
WRE3	1		1	1			2		2	1	1		1
CGTCA-motif	3	1	1	1	2	1	1		3	1	1			1
DRE core	1												2
DRE1			1							1
